# Supplementary material for: Affinity-matured variants derived from nimotuzumab keep the original fine specificity and exhibit superior biological activity
Source: PubMed Central journal article supplement (PMC6985160; doi:10.1038/s41598-019-57279-w), 2020-01-27
Supplement: 41598_2019_57279_MOESM1_ESM.pdf [file 41598_2019_57279_MOESM1_ESM.pdf]

## **Supplemental information**

### **Title:**

**Affinity-matured variants derived from nimotuzumab keep the original fine specificity and exhibit superior biological activity**

### **Authors:**

Yaima Tundidor<sup>1</sup>, Luis F. Ponce<sup>1</sup>, Lisset Chao<sup>1</sup>, Joaquín Solozábal<sup>1</sup>, Michael Hust<sup>2</sup>, Stefan Dübel<sup>2</sup>, Gertrudis Rojas<sup>1\*</sup>

### **Author affiliations:**

<sup>1</sup> Center of Molecular Immunology, calle 216 esq 15, PO Box 16040, Atabey, Playa, CP 11300, La Habana, Cuba

<sup>2</sup> Technische Universität Braunschweig, Institute of Biochemistry, Biotechnology and Bioinformatics, Department of Biotechnology, Spielmannstraße 7, 38106 Braunschweig, Germany

\*Correspondence should be addressed to G.R.: grojas@cim.sld.cu



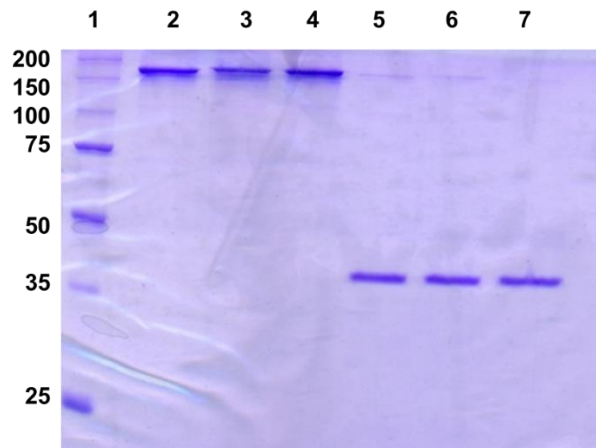

**Supplementary Figure 2.** The integrity of monoclonal antibodies and their Fab fragments was analyzed by non-reducing SDS-PAGE on a 9% gel. The molecular weight marker is shown in lane 1, with bands (kDa) identified in the left side. Protein A-purified nimotuzumab (2), K4 mAb (3) and K5 mAb (4) were analyzed. Fab fragments were obtained from the three antibodies with the Pierce™ Fab Preparation Kit (Thermo Scientific) and also analyzed. Fab fragments derived from nimotuzumab are shown in (5), and Fab fragments of K4 and K5 mAbs appear in lanes (6) and (7) respectively. The total protein amount loaded at each lane was 1  $\mu$ g.

**a**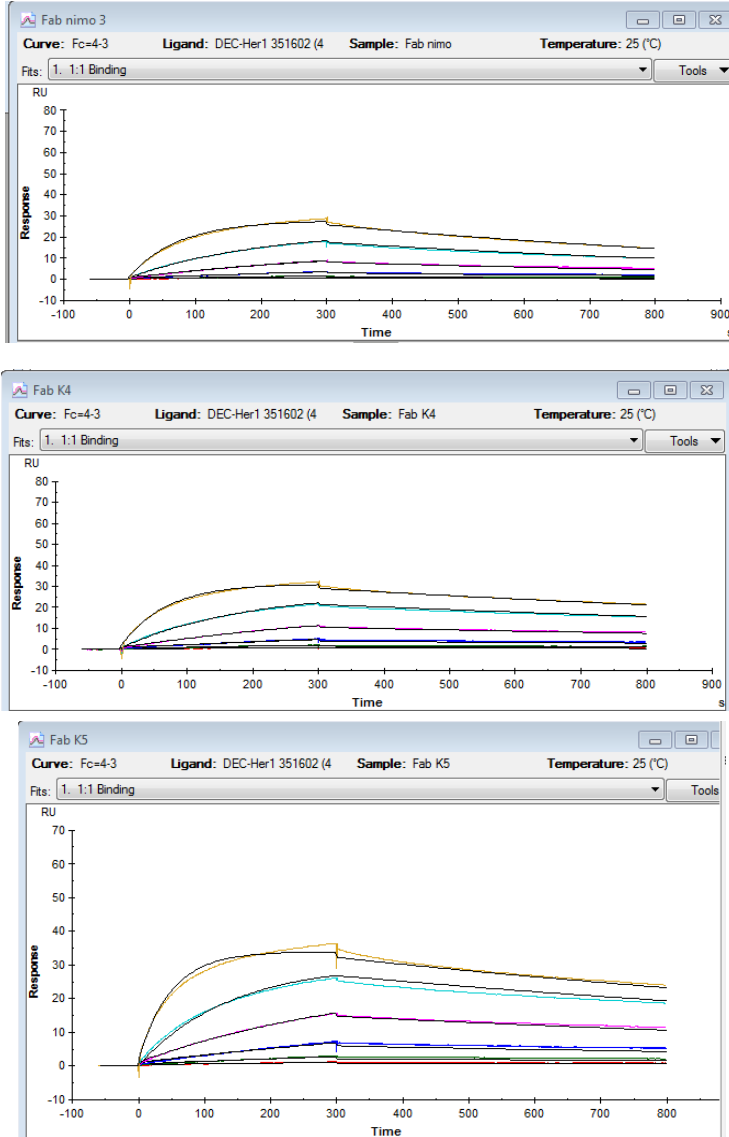**b**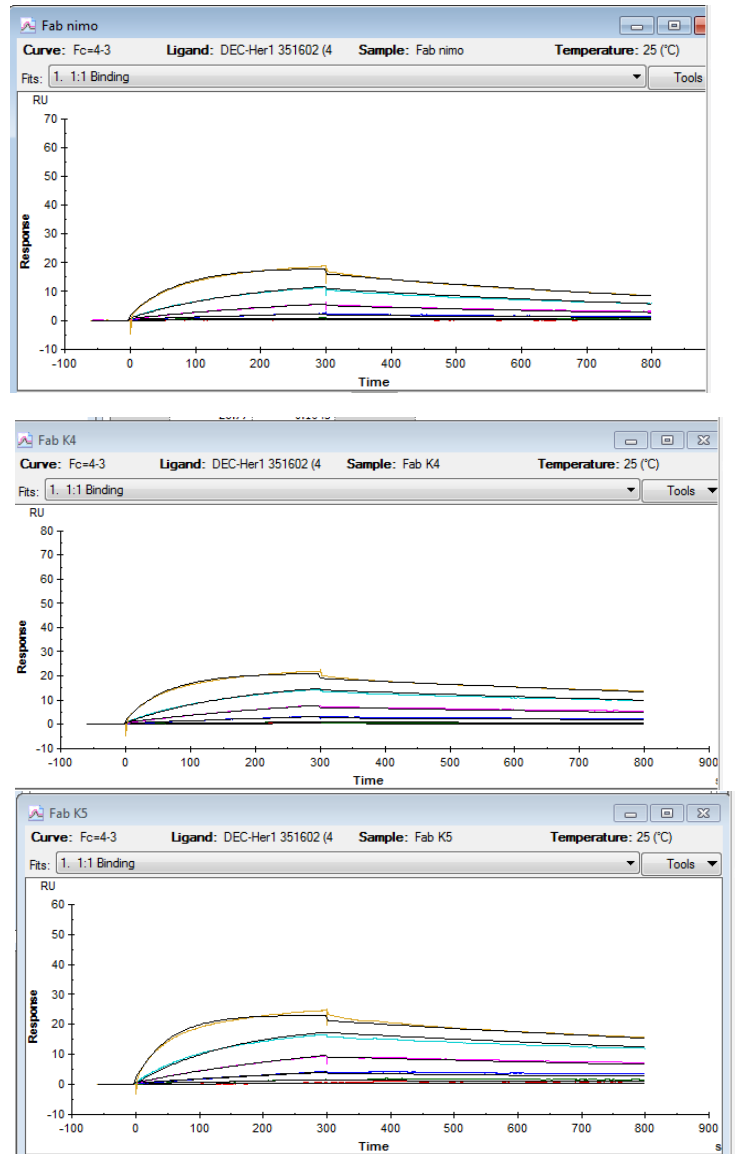

**Supplementary Figure 3.** Raw sensorgrams and fitted curves of two different experiments of affinity measurement (a and b) are shown. Binding experiments were carried out using the Biacore T200 instrument and the Control software 2.0.1. Fab preparations derived from nimotuzumab (top panels), K4 mAb (middle panels) and K5 mAb (bottom panels) were injected over a sensorchip coated with EGF-R extracellular domain recombinant protein. Sensorgrams were analyzed using Biacore T200 evaluation software 3.0. Kinetic data were globally fitted to the 1:1 model.
